# Supplementary material for: Structural and magnetic characterization of the double perovskite Pb2FeMoO6
Source: Royal Society of Chemistry journal article supplement (doi:10.1039/c5tc03529e), 2016-01-01

Supplementary Information

# Structural and magnetic characterization of the double perovskite $\text{Pb}_2\text{FeMoO}_6$ .

*Francesco Mezzadri,<sup>1\*</sup> Davide Delmonte,<sup>2</sup> Fabio Orlandi,<sup>1</sup> Chiara Pernechele,<sup>3</sup> Gianluca Calestani,<sup>1</sup> Massimo Solzi,<sup>3</sup> Marco Lantieri,<sup>4</sup> Gabriele Spina,<sup>5</sup> Riccardo Cabassi,<sup>2</sup> Fulvio Bolzoni,<sup>2</sup> Maria Fittipaldi,<sup>5</sup> Marco Merlini,<sup>6</sup> Andrea Migliori<sup>7</sup>, Pascal Manuel<sup>8</sup> and Edmondo Gilioli<sup>2</sup>.*

<sup>1</sup> Dipartimento di Chimica, Università di Parma, Parco Area delle Scienze 17/A 43124 Parma, Italy

<sup>2</sup> IMEM-CNR, Parco Area delle Scienze 37/A, 43124 Parma, Italy

<sup>3</sup> Dipartimento di Fisica e Scienze della Terra, Università di Parma, Parco Area delle Scienze 7/A, 43124 Parma, Italy

<sup>4</sup> ISC-CNR, via Madonna del Piano 10, 50019 Sesto Fiorentino (FI), Italy

<sup>5</sup> Dipartimento di Fisica, Università di Firenze, via Sansone 1, 50019 Sesto Fiorentino (FI), Italy

<sup>6</sup> Dipartimento di Scienze della Terra, Università degli Studi di Milano, Via Botticelli 23, I-20133 Milano, Italy

<sup>7</sup> IMM-CNR, via Gobetti 101, 40129 Bologna, Italy

<sup>8</sup> ISIS, Harwell Science and Innovation Campus, STFC, Chilton, Oxon, OX11 0QX, United Kingdom

**Table S1.** Refined atomic parameters of  $\text{Pb}_2\text{FeMoO}_6$  at room temperature.

| <b>Pb<sub>2</sub>FeMoO<sub>6</sub> 310 K</b> |           |           |           |           |                                    |
|----------------------------------------------|-----------|-----------|-----------|-----------|------------------------------------|
| S.G. 225 (Fm-3m)                             |           |           |           |           |                                    |
| a=b=c=7.96477(7) Å                           |           |           |           |           |                                    |
| Vol.=505.265(14) Å <sup>3</sup> (Z=1)        |           |           |           |           |                                    |
| d=8.701 g/cm <sup>3</sup>                    |           |           |           |           |                                    |
| Atom (site)                                  | x         | y         | z         | occ.      | U <sub>iso</sub> (Å <sup>2</sup> ) |
| PB1                                          | 0.2298(2) | 0.2298(2) | 0.2298(2) | 0.25      | 0.0078(8)                          |
| FE1                                          | 0         | 0         | 0         | 0.825(12) | 0.0072(3)                          |
| MO2                                          | 0         | 0         | 0         | 0.175(12) | 0.0072(3)                          |
| MO1                                          | ½         | ½         | ½         | 0.725(12) | 0.0072(3)                          |
| FE2                                          | ½         | ½         | ½         | 0.275(12) | 0.0072(3)                          |
| O1                                           | 0.7495(4) | 0         | 0         | 1         | 0.0108(3)                          |

Nobs = 11174  
Number of parameters = 70  
Rp = 0.0359  
wRp = 0.0484

**Table S2.** Agreement factors of the refinement carried out on the individual histograms at RT.

| Histogram     | wRp    | Rp     | Nobs | R(F <sup>2</sup> ) |
|---------------|--------|--------|------|--------------------|
| SPRD          | 0.0604 | 0.0359 | 1030 | 0.1509             |
| TOF 2θ=58.3°  | 0.0373 | 0.0247 | 26   | 0.0458             |
| TOF 2θ=90°    | 0.0505 | 0.0352 | 154  | 0.0890             |
| TOF 2θ=121.6° | 0.0370 | 0.0252 | 167  | 0.0891             |
| TOF 2θ=152.8° | 0.0527 | 0.0413 | 258  | 0.1021             |

**Figure S1.** Rietveld plot of the TOF data collected on bank 2 of WHISH (2θ=58.3°) at 310 K.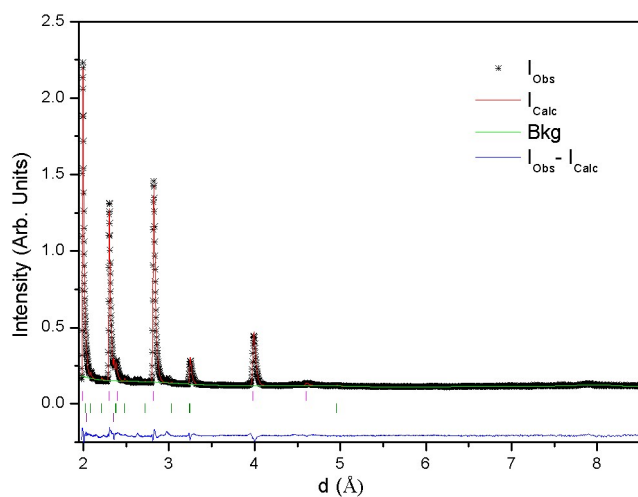

**Figure S2.** Rietveld plot of the TOF data collected on bank 3 of WHISH ( $2\theta=90^\circ$ ) at 310 K.

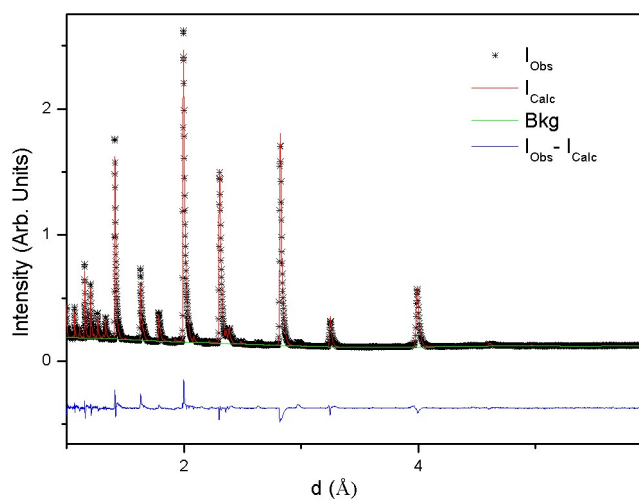

**Figure S3.** Rietveld plot of the TOF data collected on bank 4 of WHISH ( $2\theta=121.6^\circ$ ) at 310 K.

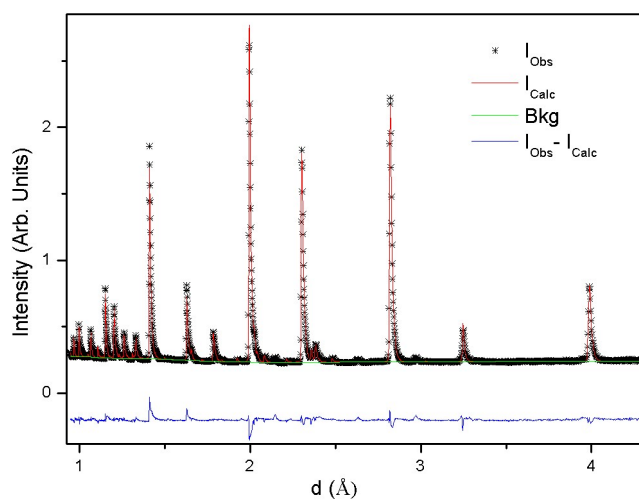

**Figure S4.** Rietveld plot of the TOF data collected on bank 5 of WHISH ( $2\theta=152.8^\circ$ ) at 310 K.

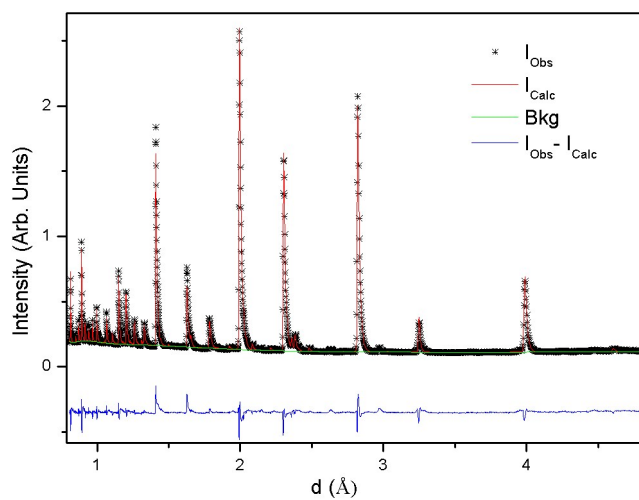

**Figure S5.** Comparison of the TOF diffraction data collected at 310 and 1.5 K.

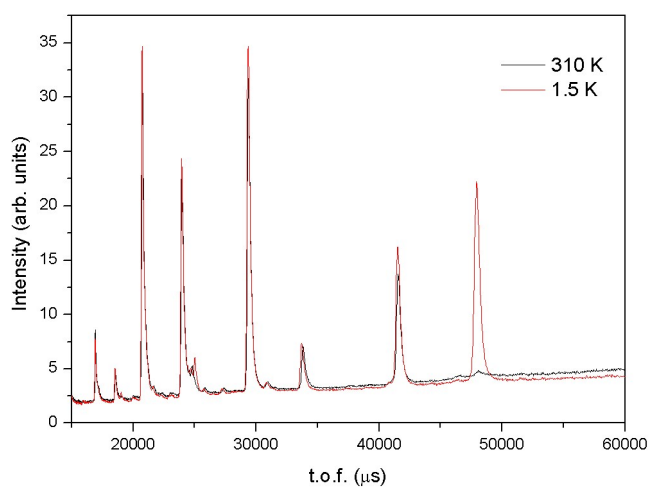

**Figure S6.** Rietveld plot of the TOF data collected on bank 3 of WHISH ( $2\theta=90^\circ$ ) at 1.5 K.

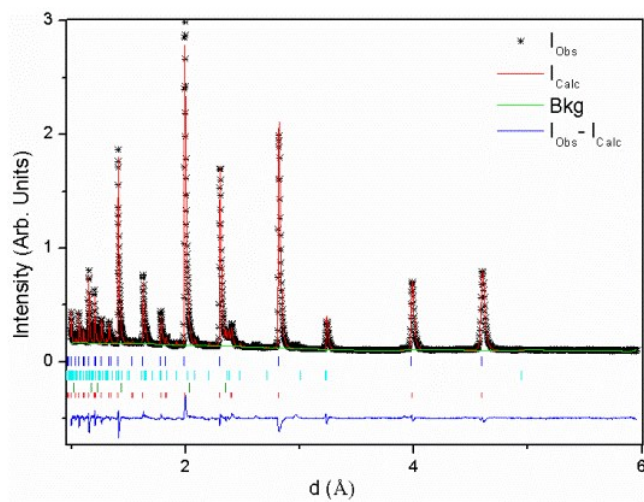

**Table S3.** Refined atomic parameters of  $\text{Pb}_2\text{FeMoO}_6$  at 1.5 K.

| <b>Pb<sub>2</sub>FeMoO<sub>6</sub> 1.5 K</b> |             |             |             |       |                                    |
|----------------------------------------------|-------------|-------------|-------------|-------|------------------------------------|
| S.G. 225 (Fm-3m)                             |             |             |             |       |                                    |
| a=b=c=7.95579(3) Å                           |             |             |             |       |                                    |
| Vol.= 503.559 (6) Å <sup>3</sup> (Z=1)       |             |             |             |       |                                    |
| Atom (site)                                  | x           | y           | z           | occ.  | U <sub>iso</sub> (Å <sup>2</sup> ) |
| PB1                                          | 0.22981(15) | 0.22981(15) | 0.22981(15) | 0.25  | 0.0027(3)                          |
| FE1                                          | 0           | 0           | 0           | 0.780 | 0.0021(2)                          |
| MO2                                          | 0           | 0           | 0           | 0.220 | 0.0021(2)                          |
| MO1                                          | ½           | ½           | ½           | 0.780 | 0.0021(2)                          |
| FE2                                          | ½           | ½           | ½           | 0.220 | 0.0021(2)                          |
| O1                                           | 0.7458(2)   | 0           | 0           | 1     | 0.0082(2)                          |
| Nobs = 9572                                  |             |             |             |       |                                    |
| Number of parameters = 106                   |             |             |             |       |                                    |
| R(F <sup>2</sup> ) = 0.052                   |             |             |             |       |                                    |
| Rp = 0.032                                   |             |             |             |       |                                    |
| wRp = 0.043                                  |             |             |             |       |                                    |

**Table S4.** Agreement factors of the refinement carried out on the individual histograms at 1.5 K.

| Histogram     | wRp    | Rp     | Nobs | R(F <sup>2</sup> ) |
|---------------|--------|--------|------|--------------------|
| TOF 2θ=58.3°  | 0.0359 | 0.0250 | 49   | 0.0582             |
| TOF 2θ=90°    | 0.0337 | 0.0241 | 199  | 0.0582             |
| TOF 2θ=121.6° | 0.0498 | 0.0386 | 221  | 0.0898             |
| TOF 2θ=152.8° | 0.0496 | 0.0411 | 326  | 0.1078             |

**Figure S7.** Thermal evolution of Mössbauer spectra. Data fitting are reported as solid lines.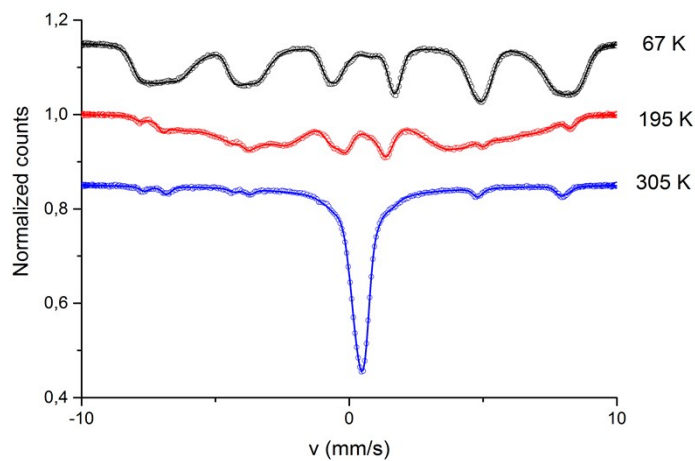

**Figure S8.** Isomer shift vs T for both the subcomponents: the straight lines stand for the Debye model based fit.

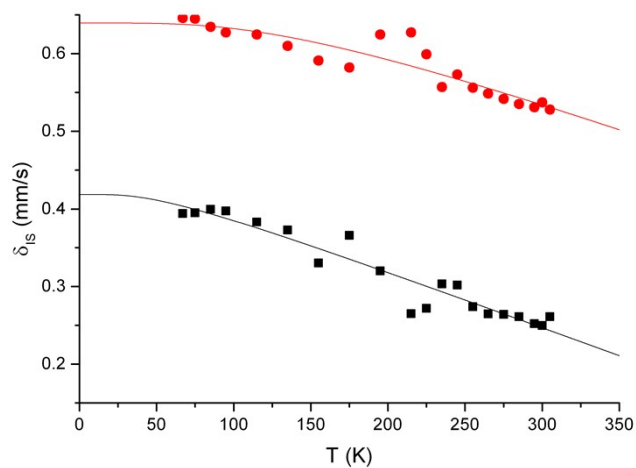

**Figure S9.** Thermal trend of  $t_a$  with the related fit based on the Debye model.

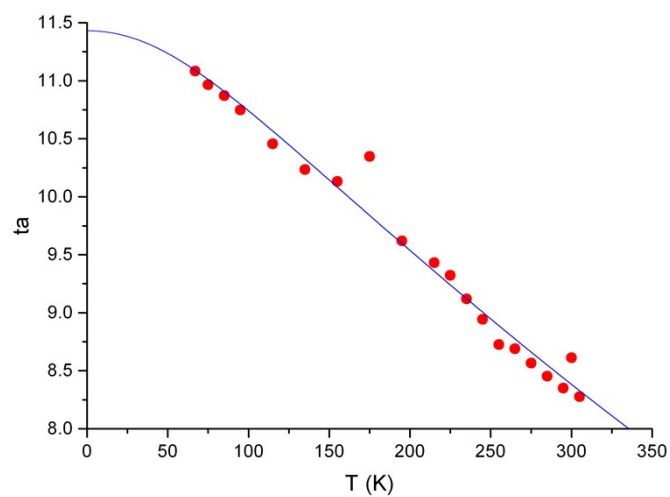

**Figure S10.** From top to bottom, hyperfine field density for the two contributions at 67, 195 and 305 K, respectively.

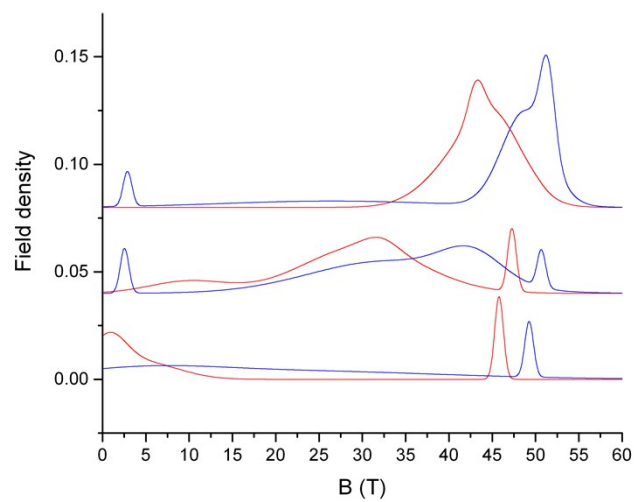

Supplement: c5tc03529e1.pdf [file c5tc03529e1.pdf]
